# Supplementary material
Source: Springer Nature journal article supplement (https://www.springermedizin.de/resource/supplementary/12958_2009_568_MOESM2_ESM.pdf/9568326)
Supplement: MOESM2 [file 9568326]

# A


  
 MSMB4 ATGAATGTTCTCCTGGGCGGCCTTGTGATCTTTGCAACCTTTGTGACTTTATGCAATGCA 60
   
 MSMB2 ATGAACGTTCTCCTGGGCGGCCTTGTGATCTTTGCCACCTTTGTGACTTTATGCAATGGA 60
   
 MSMB3 ATGAATGTTCTCCTGGGCGGCCTTGTGATCTTTGCAACCTTTGCGACTTTATGCAATGCA 60
   
 \*\*\*\*\*
   


  
 MSMB4 TCATGCTATTTAATACTGAATGACATAGTTCAGAAAGAGTCAACCAAGGAATGCACAGAT 120
   
 MSMB2 TCATGCTATGTAATACGTCATAAGATAGTGCCAGGAGAGACAATCAAAGAATGCACGGAT 120
   
 MSMB3 TCATGCTATTTAATACTGAATGACGTAGTTCAGGAGAGTCAACCAAGGAATGCACAGAT 120
   
 \*\*\*\*\*
   
 MSMB4 CTGGAAGGAAACAAACACCCAATAAACTCAAGGTGGCGGACTGACAACCTGTGAGACATGT 180
   
 MSMB2 CTCAAAGGAAACAAACACCCGCTAGACTCAAGGTGGCGGACTGAAGACTGTGAGCTATGT 180
   
 MSMB3 CTGAAAGGAAACAAACATCCAATAAACTCAAAGTGGCGGACTGACAGCTGTGACATATGT 180
   
 \*\* \*\*\*\*\* \*\* \* \*\*\*\*\* \*\*\*\*\* \*\*\*\*\* \*\* \* \*\*\*\*\*
   

  
 MSMB4 GCTTGTGGCGAAAAGAAATATCATGTTGCACTCTTGTCTTCTACACCTGTGGGTTATGAC 240
   
 MSMB2 GCTTGCCGTGACATAGAAATATCATGTTGCTCCCTTGTCTTCTACACCTGTGGGTTATGAC 240
   
 MSMB3 ACTTGCCAAAGAAAAGAAATATCATGTTGCACTCTTGTTCCTACGCCTGTGGGTTATGAC 240
   
 \*\*\*\*\* \*\* \* \*\*\*\*\* \* \*\*\*\*\* \*\*\*\*\* \*\*\*\*\*
   
 MSMB4 AGACACAAC TGCCGAAAATCTTCAACAAGGAGACCTGCAAGATAAGTGTGGTGGAGAAG 300
   
 MSMB2 AGACACAAC TGCCGAAAATCTTCAACAAGGAGACCTGCAAGATAAGTGTGGTGGAGAAG 300
   
 MSMB3 ATACACAAG TGCCGAAAATCTTCAACAAGGAGGAGTGCAAGTTAACTGTGGTGGAGAAG 300
   
 \* \*\*\*\*\* \*\* \* \*\*\*\*\* \*\*\*\*\* \*\*\*\*\* \*\*\*\*\*
   
 MSMB4 AAGGACCCAATAGGCCCTGTGGTGTGTCAGCGGATGGATATCG 342
   
 MSMB2 AAGGACCCAATAGGCCCTGTGGTGTGTCAGTGGATGGATATCG 342
   
 MSMB3 AAGAACCACATAAGACCTGTGATGTCAGTGCATGGATATTG 342
   
 \*\*\* \*\*\*\*\* \*\* \* \*\*\*\*\* \*\*\*\*\* \* \*\*\*\*\* \*

# B

## Greek key motif

MSMB4 SCYLILNDIVPHEESTKECTDLEGNKHPINSRWRTDNCETCACGEKEISCCTL
   
 MSMB2 SCYVIRHKIVPGETTIKECTDLKGNKHPILDSRWRTEDCELCACRDIEISCCSL
   
 MSMB3 SCYLILNDVVPGESTKECTDLKGNKHPINSKWRDTSCLICTCQEKEISCCTL

## MSMB specific motif

MSMB4 VSTPVGYDRHNCRKIFNKETCKISVVEKKDPNRP CGVSGWIS
   
 MSMB2 VSTPVGYDRHNCRKIFNKETCKISVVEKKDPNRP CGVSGWIS
   
 MSMB3 VATPVGYDIHKCQKIFNKEECKLTVVEKKNPHKTC DVS AWIL
